# Supplementary material for: Transmission dynamics of human herpesvirus 6A, 6B and 7 from whole genome sequences of families
Source: Springer Nature journal article supplement (doi:10.1186/s12985-022-01941-9), 2022-12-24
Supplement: MOESM1 [file 23857260]

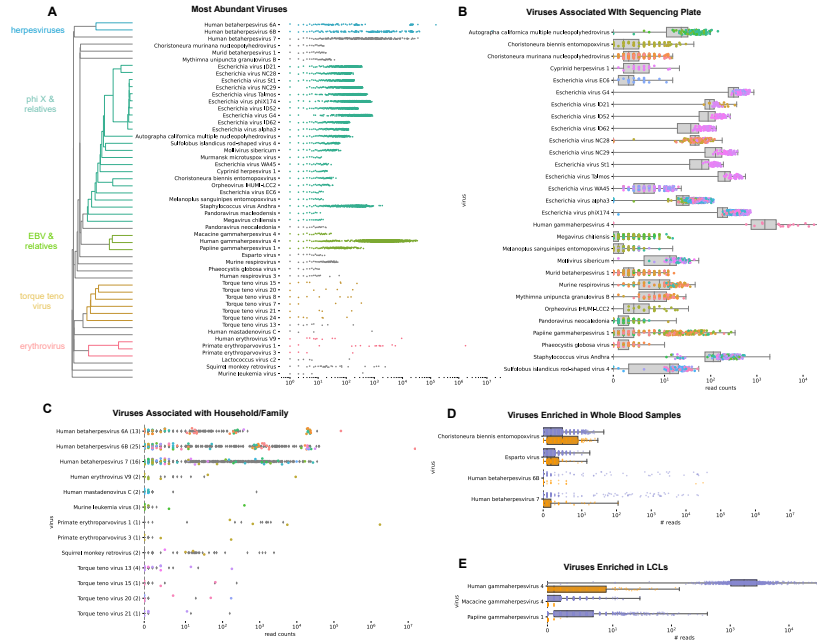

Figure S1: **(A)** Top 50 most abundant viruses, clustered by Spearman correlation across samples. **(B)** Viruses with abundance significantly associated with sequencing plate, per F-regression results. Colors represent sequencing plates that had significantly higher abundances of a given microbe compared to the rest of the population. Samples from sequencing plates without significant enrichment of a microbe are captured in the grey box plots. **(C)** Viruses associated with household per F-regression. Like **(B)**, colors represent households that had significantly higher abundances of a given microbe compared to the rest of the population. Samples from households without significant enrichment of a microbe are captured in the grey box plots. Note that a non-visible boxplot indicates that the median, 5% and 95% percentiles were at zero. **(D)** Viruses associated with cell type per F-regression results, and more abundant in whole blood samples (orange) than LCL samples (purple). **(E)** Viruses associated with cell type per F-regression results, and more abundant in LCL samples than whole blood samples.



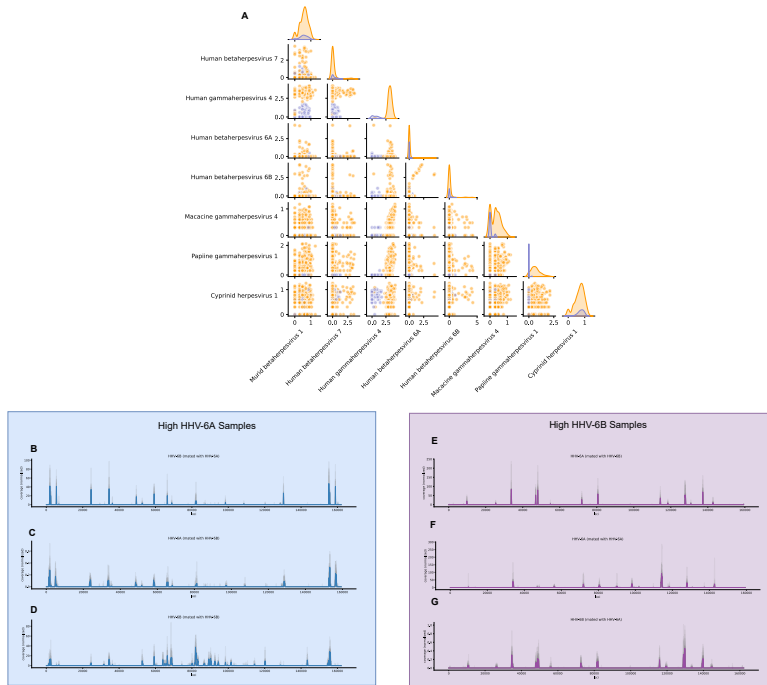

Figure S3: **(A)** Pair-plots of herpesviruses counts. There are some slight correlations due to mismappings between homologous and low-complexity regions. **(B)-(D)** Normalized coverages for samples with high HHV-6A loads. **(B)** Coverage of reads mapped to HHV-6A that were paired with mates mapped to HHV-6B. **(C)** Coverage of reads mapped to HHV-6B that were paired with mates mapped to HHV-6A. **(D)** Coverage of reads mapped to HHV-6A that were paired with mates mapped to HHV-6A. **(E)-(G)** Normalized coverages for samples with high HHV-6B loads. **(E)** Coverage of reads mapped to HHV-6B that were paired with mates mapped to HHV-6A. **(F)** Coverage of reads mapped to HHV-6A that were paired with mates mapped to HHV-6B. **(G)** Coverage of reads mapped to HHV-6A that were paired with mates mapped to HHV-6B.

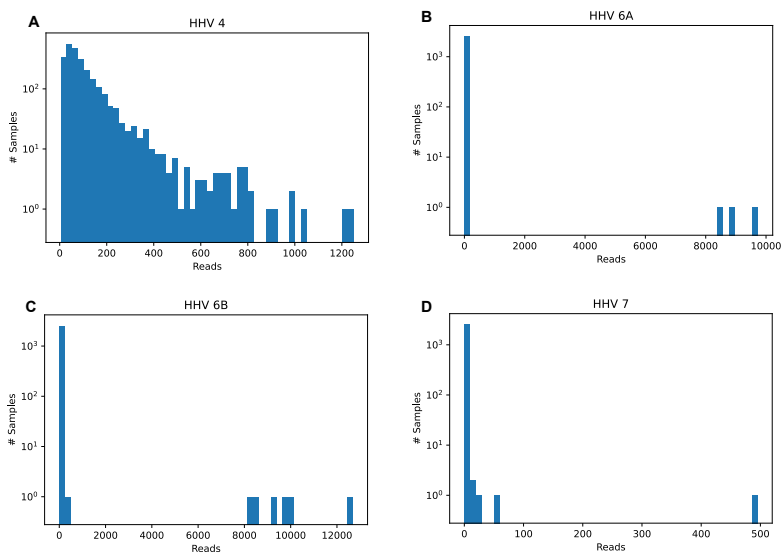

Figure S4: (A) Numbers of reads aligned to HHV-4 (Epstein Barr Virus) in the 1000genomes dataset. (B) Numbers of reads aligned to HHV-6A in the 1000genomes dataset. (C) Numbers of reads aligned to HHV-6B in the 1000genomes dataset. (D) Numbers of reads aligned to HHV-7 in the 1000genomes dataset.
